# Supplementary material for: An association study on PSCA rs2294008 polymorphism and gastric cancer: A meta-analysis
Source: Front Gastroenterol (Lausanne). 2022 Oct 24;1:944525. doi: 10.3389/fgstr.2022.944525 (PMC12952324; doi:10.3389/fgstr.2022.944525)
Supplement: Supplementary file 1 [file Table_1.xlsx]

## Sheet: Sheet1
							case			control
Author	Country	Ethnicity	SOC	Genotyping	case	control	CC	CT	TT	CC	CT	TT	HWE
Lochhead 2011	USA	Caucasian	PB	Taqman	308	208	85	129	94	49	110	49	0.405381
Lochhead 2011	Poland	Caucasian	PB	Taqman	292	382	47	143	102	101	166	115	＜0.05
Sala 2012	Europe	Caucasian	PB	Taqman	409	1515	93	198	118	491	714	310	0.0883934
Rizzato 2013	Germany	Caucasian	PB	Taqman	178	1057	23	86	69	231	507	319	0.269195
Kupcinskas 2014	Lithuania	Caucasian	HB	Taqman	251	243	33	116	102	64	123	56	0.834001
Sun 2014	USA	Caucasian	HB	Taqman	130	125	17	64	49	30	63	32	0.926437
Garcia- Gonzalez 2015	Spain	Caucasian	HB	Taqman	603	675	154	302	147	199	346	130	0.349485
Patricio 2020	Chile	Other	HB	Other	307	310	110	162	35	87	156	67	0.851144
Sakamoto 2008	Korea	Asian	HB	Taqman	871	390	133	461	277	122	176	92	0.0690476
Sakamoto{J} 2008	Japan	Asian	HB	GWAS	1524	1396	96	700	728	210	650	536	0.573767
Wu 2009	China	Asian	PB	PCR-RFLP	1710	995	759	819	132	506	412	77	0.586548
Matsuo 2009	Japan	Asian	HB	Taqman	708	708	330	329	49	273	338	97	0.63783
Ou 2010	China	Asian	HB	PCR-RFLP	196	246	85	93	18	132	96	18	0.92427
Lu 2010	China	Asian	PB	PCR-RFLP	1023	1069	547	404	72	605	387	77	0.166371
Zeng 2011	China	Asian	HB	PCR-RFLP	460	549	202	216	42	289	223	37	0.493216
Song 2011	Korea	Asian	HB	PCR-RFLP	3239	1700	570	1620	1049	414	818	468	0.130495
Li 2012	China	Asian	PB	Other	300	300	124	141	35	168	111	21	0.650129
Zhao 2013	China	Asian	PB	Other	717	951	275	342	100	465	401	85	0.912729
Ichikawa 2015	Japan	Asian	HB	PCR-RFLP	193	266	24	104	65	52	119	95	0.185098
Zhang 2015	China	Asian	HB	Other	475	480	227	207	41	261	183	36	0.617743
Mou 2015	China	Asian	PB	Other	198	130	23	126	49	5	34	91	0.425691
Turdikulova 2016	Uzbekistan	Asian	HB	PCR-RFLP	268	248	78	190	0	119	109	20	0.472062
Qiu 2016	China	Asian	HB	Taqman	1124	1192	537	489	98	663	383	146	＜0.05
Sun 2016	China	Asian	HB	Taqman	702	774	332	309	61	405	297	72	0.105183
cai 2017	China	Asian	PB	PCR-RFLP	485	488	215	225	45	268	173	47	＜0.05
Sung 2017	China	Asian	HB	GWAS	194	170	24	112	58	54	84	32	0.94732
Yan 2019	China	Asian	HB	Taqman	549	592	269	236	44	337	191	64	＜0.05
Reza 2020	Iren	Asian	HB	PCR-RFLP	99	96	62	29	8	63	24	9	＜0.05
Guan 2020	China	HB	Asian	Other	982	1964	615	337	30	1071	744	149	0.21152
