# Supplementary material for: An association study on PSCA rs2294008 polymorphism and gastric cancer: A meta-analysis
Source: Front Gastroenterol (Lausanne). 2022 Oct 24;1:944525. doi: 10.3389/fgstr.2022.944525 (PMC12952324; doi:10.3389/fgstr.2022.944525)
Supplement: Supplementary file 2 [file Table_2.xlsx]

## Sheet: Sheet1
Varibles	No.of studies	Homozygous TTvs.CC			Heterozygous CTvs.CC			Recessive TTvs.(CT+CC)			Dominant (CT+TT)vs.CC			Allele Comparing Tvs.C
		OR(95%CI)	P eff	P het	OR(95%CI)	P eff	P het	OR(95%CI)	P eff	P het	OR(95%CI)	P eff	P het	OR(95%CI)	P eff	P het
All	28	1.36 (1.09, 1.69)	0.006	＜0.00001	1.46 (1.31, 1.63)	＜0.001	＜0.00001	1.07 (0.90, 1.27)	0.428	＜0.00001	1.46 (1.29, 1.65)	＜0.001	＜0.00001	1.17 (1.05, 1.31)	0.004	＜0.00001
Ethnicity
Caucasian	7	1.92 (1.49, 2.48)	＜0.001	0.033	1.38 (1.07, 1.78)	0.013	0.009	1.51 (1.32, 1.73)	＜0.001	0.333	1.56 (1.21, 2.01)	0.001	0.004	1.38 (1.22, 1.57)	＜0.001	0.029
Asian	20	1.26 (0.97, 1.64)	0.087	＜0.00001	1.52 (1.35, 1.73)	＜0.001	＜0.00001	0.97 (0.78, 1.20)	0.76	＜0.00001	1.48 (1.28, 1.70)	＜0.001	＜0.00001	1.18 (1.05, 1.31)	0.004	＜0.00001
Other	1	0.41 (0.25, 0.68)	＜0.001	/	0.82 (0.57, 1.17)	0.28	/	0.47 (0.30, 0.73)	/	/	0.70 (0.50, 0.98)	/	/	0.37 (0.29, 0.46)	＜0.001	/
Genotyping
Taqman	12	1.45 (1.03, 2.05)	0.035	＜0.00001	1.40 (1.15, 1.70)	0.001	＜0.00001	1.17 (0.92, 1.50)	0.203	＜0.00001	1.45 (1.17, 1.79)	0.001	＜0.00001	1.26 (1.09, 1.45)	0.002	＜0.00001
PCR-RFLP	9	1.30 (1.05, 1.60)	0.016	0.214	1.47 (1.28, 1.69)	＜0.001	0.015	1.07 (0.89, 1.28)	0.475	0.06	1.43 (1.27, 1.61)	＜0.001	0.044	1.21 (1.15, 1.28)	＜0.001	0.618
GWAS	2	3.11 (2.43, 3.98)	＜0.001	0.374	2.46 (1.94, 3.13)	＜0.001	0.443	1.49 (1.30, 1.72)	＜0.0001	0.389	2.74 (2.18, 3.45)	＜0.001	0.457	1.59 (1.33, 1.91)	＜0.001	0.195
Other	5	0.84 (0.37, 1.93)	0.685	＜0.00001	1.26 (0.99, 1.62)	0.064	0.03	0.74 (0.30, 1.83)	0.516	＜0.00001	1.11 (0.76, 1.63)	0.582	＜0.00001	0.78 (0.42, 1.44)	0.421	＜0.00001
SOC
PB	10	1.36 (1.01, 1.84)	0.042	＜0.00001	1.37 (1.19, 1.58)	＜0.001	0.012	1.06 (0.75, 1.50)	0.737	＜0.00001	1.39 (1.18, 1.64)	＜0.001	＜0.00001	1.15 (0.96, 1.38)	0.118	＜0.00001
HB	18	1.37 (1.01, 1.85)	0.042	＜0.00001	1.52 (1.30, 1.78)	＜0.001	＜0.00001	1.08 (0.88, 1.31)	0.469	＜0.00001	1.52 (1.27, 1.81)	＜0.001	＜0.00001	1.19 (1.03, 1.37)	0.019	＜0.00001
Subgroup by location
Cardia	6	1.13 (0.75, 1.70)	0.572	0.135	0.95 (0.65, 1.39)	0.778	0.039	1.17 (0.90, 1.51)	0.232	0.496	0.99 (0.68, 1.44)	0.969	0.031	1.05 (0.85, 1.30)	0.629	0.095
Non-cardia	6	1.71 (1.38, 2.12)	＜0.0001	0.493	1.27 (1.03, 1.56)	0.023	0.228	1.53 (1.28, 1.83)	＜0.0001	0.501	1.40 (1.18, 1.65)	＜0.0001	0.36	1.33 (1.19, 1.48)	＜0.0001	0.362
Subgroup by histology
Intestinal	12	1.39 (1.01, 1.91)	0.046	＜0.00001	1.34 (1.11, 1.62)	0.002	＜0.00001	1.17 (0.95, 1.44)	0.13	＜0.00001	1.37 (1.10, 1.70)	0.004	＜0.00001	1.21 (1.05, 1.41)	0.01	＜0.00001
diffuse	12	2.44 (1.63, 3.65	＜0.0001	＜0.00001	1.71 (1.26, 2.33)	0.001	＜0.00001	1.67 (1.35, 2.06)	＜0.0001	0.001	1.91 (1.38, 2.66)	＜0.0001	＜0.00001	1.52 (1.29, 1.79)	＜0.0001	＜0.00001
Helicobacter pylori
positive	3	1.20 (0.83, 3.14)	0.966	<0.00001	1.17 (0.80, 1.71)	0.426	0.007	1.26 (0.71, 2.35)	0.84	<0.00001	1.20 (0.70, 2.06)	0.507	<0.00001	1.10 (0.69,1.76)	0.689	<0.00001
negative	3	1.08 (0.39, 2.96)	0.884	<0.00001	1.14 (0.66, 1.98)	0.762	0.041	1.08 (0.51, 2.30)	0.839	0.004	1.01 (0.55, 1.82)	0.99	0.002	1.03 (0.62, 1.72)	0.913	<0.00001
Sex
male	6	1.02 (0.37, 2.85)	0.97	＜0.00001	1.23 (1.03, 1.46)	0.021	0.06	0.96 (0.44, 2.12)	0.925	0.001	/	/	/	1.02 (0.65, 1.61)	0.915	＜0.00001
female	6	0.58 (0.18, 1.84)	0.353	0.015	1.19 (0.95, 1.49)	0.127	0.22	0.59 (0.18, 1.95)	0.391	0.007	1.13 (0.87, 1.47)	0.344	0.078	0.88 (0.56, 1.38)	0.587	0.047
Smoker
never	6	1.37 (0.36, 5.25)	0.647	＜0.00001	1.35 (1.08, 1.69)	0.009	0.033	1.01 (0.41, 2.49)	0.991	0.001	1.50 (0.67, 3.38)	0.323	＜0.00001	1.93 (1.26, 2.95)	0.002	0.02
ever	6	1.21 (0.41, 3.58)	0.737	＜0.00001	1.16 (0.97, 1.38)	0.102	0.169	1.16 (0.50, 2.66)	0.734	＜0.00001	1.18 (0.93, 1.50)	0.161	0.012	1.14 (0.69, 1.88)	0.621	＜0.00001
