# Supplementary material for: An association study on PSCA rs2294008 polymorphism and gastric cancer: A meta-analysis
Source: Front Gastroenterol (Lausanne). 2022 Oct 24;1:944525. doi: 10.3389/fgstr.2022.944525 (PMC12952324; doi:10.3389/fgstr.2022.944525)
Supplement: Supplementary file 3 [file Table_3.xlsx]

## Sheet: Sheet1
Author	SOC	Ethnicity	Genotyping	CT+TT	CC	CT+TT	cc
Lochhead 2011	PB	Caucasian	Taqman	223	85	159	49
Lochhead 2011	PB	Caucasian	Taqman	245	47	281	101
Sala 2012	PB	Caucasian	Taqman	316	93	1024	491
Rizzato 2013	PB	Caucasian	Taqman	155	23	826	231
Kupcinskas 2014	HB	Caucasian	Taqman	218	33	179	64
Sun 2014	HB	Caucasian	Taqman	113	17	95	30
Garcia- Gonzalez 2015	HB	Caucasian	Taqman	449	154	476	199
Patricio 2020	HB	Other	Other	197	110	223	87
Sakamoto 2008	HB	Asian	Taqman	738	133	268	122
Sakamoto{J} 2008	HB	Asian	GWAS	1428	96	1186	210
Wu 2009	PB	Asian	PCR-RFLP	951	759	489	506
Matsuo 2009	HB	Asian	Taqman	378	330	435	273
Ou 2010	HB	Asian	PCR-RFLP	111	85	114	132
Lu 2010	PB	Asian	PCR-RFLP	476	547	464	605
Zeng 2011	HB	Asian	PCR-RFLP	258	202	260	289
Song 2011	HB	Asian	PCR-RFLP	2669	570	1286	414
Li 2012	PB	Asian	Other	176	124	132	168
Zhao 2013	PB	Asian	Other	442	275	486	465
Ichikawa 2015	HB	Asian	PCR-RFLP	169	24	214	52
Zhang 2015	HB	Asian	Other	248	227	219	261
Mou 2015	PB	Asian	Other	175	23	125	5
Turdikulova 2016	HB	Asian	PCR-RFLP	190	78	129	119
Qiu 2016	HB	Asian	Taqman	587	537	529	663
Sun 2016	HB	Asian	Taqman	370	332	369	405
cai 2017	PB	Asian	PCR-RFLP	270	215	220	268
Sung 2017	HB	Asian	GWAS	170	24	116	54
Yan 2019	HB	Asian	Taqman	280	269	255	337
Reza 2020	HB	Asian	PCR-RFLP	37	62	33	63
Guan 2020	HB	Asian	Other	367	615	893	1071
