# Supplementary material for: An association study on PSCA rs2294008 polymorphism and gastric cancer: A meta-analysis
Source: Front Gastroenterol (Lausanne). 2022 Oct 24;1:944525. doi: 10.3389/fgstr.2022.944525 (PMC12952324; doi:10.3389/fgstr.2022.944525)
Supplement: Supplementary file 4 [file Table_4.xlsx]

## Sheet: Sheet1
Author	SOC	Ethnicity	Genotyping	TT	CT+CC	tt	ct+cc
Lochhead 2011	PB	Caucasian	Taqman	94	214	49	159
Lochhead 2011	PB	Caucasian	Taqman	102	190	115	267
Sala 2012	PB	Caucasian	Taqman	118	291	310	1205
Rizzato 2013	PB	Caucasian	Taqman	69	109	319	738
Kupcinskas 2014	HB	Caucasian	Taqman	102	149	56	187
Sun 2014	HB	Caucasian	Taqman	49	81	32	93
Garcia- Gonzalez 2015	HB	Caucasian	Taqman	147	456	130	545
Patricio 2020	HB	Other	Other	35	272	67	243
Sakamoto 2008	HB	Asian	Taqman	277	594	92	298
Sakamoto{J} 2008	HB	Asian	GWAS	728	796	536	860
Wu 2009	PB	Asian	PCR-RFLP	132	1578	77	918
Matsuo 2009	HB	Asian	Taqman	49	659	97	611
Ou 2010	HB	Asian	PCR-RFLP	18	178	18	228
Lu 2010	PB	Asian	PCR-RFLP	72	951	77	992
Zeng 2011	HB	Asian	PCR-RFLP	42	418	37	512
Song 2011	HB	Asian	PCR-RFLP	1049	2190	468	1232
Li 2012	PB	Asian	Other	35	265	21	279
Zhao 2013	PB	Asian	Other	100	617	85	866
Ichikawa 2015	HB	Asian	PCR-RFLP	65	128	95	171
Zhang 2015	HB	Asian	Other	41	434	36	444
Mou 2015	PB	Asian	Other	49	149	91	39
Turdikulova 2016	HB	Asian	PCR-RFLP	0	268	20	228
Qiu 2016	HB	Asian	Taqman	98	1026	146	1046
Sun 2016	HB	Asian	Taqman	61	641	72	702
cai 2017	PB	Asian	PCR-RFLP	45	440	47	441
Sung 2017	HB	Asian	GWAS	58	136	32	138
Yan 2019	HB	Asian	Taqman	44	505	64	528
Reza 2020	HB	Asian	PCR-RFLP	8	91	9	87
Guan 2020	HB	Asian	Other	30	952	149	1815
