# Supplementary material for: An association study on PSCA rs2294008 polymorphism and gastric cancer: A meta-analysis
Source: Front Gastroenterol (Lausanne). 2022 Oct 24;1:944525. doi: 10.3389/fgstr.2022.944525 (PMC12952324; doi:10.3389/fgstr.2022.944525)
Supplement: Supplementary file 5 [file Table_5.xlsx]

## Sheet: Sheet1
Author	Ethnicity	SOC	Genotyping	CT(case)	CC	CT（control）	CC
Lochhead 2011	Caucasian	PB	Taqman	129	85	110	49
Lochhead 2011	Caucasian	PB	Taqman	143	47	166	101
Sala 2012	Caucasian	PB	Taqman	198	93	714	491
Rizzato 2013	Caucasian	PB	Taqman	86	23	507	231
Kupcinskas 2014	Caucasian	HB	Taqman	116	33	123	64
Sun 2014	Caucasian	HB	Taqman	64	17	63	30
Garcia- Gonzalez 2015	Caucasian	HB	Taqman	302	154	346	199
Patricio 2020	Other	HB	Other	162	110	156	87
Sakamoto 2008	Asian	HB	Taqman	461	133	176	122
Sakamoto{J} 2008	Asian	HB	GWAS	700	96	650	210
Wu 2009	Asian	PB	PCR-RFLP	819	759	412	506
Matsuo 2009	Asian	HB	Taqman	329	330	338	273
Ou 2010	Asian	HB	PCR-RFLP	93	85	96	132
Lu 2010	Asian	PB	PCR-RFLP	404	547	387	605
Zeng 2011	Asian	HB	PCR-RFLP	216	202	223	289
Song 2011	Asian	HB	PCR-RFLP	1620	570	818	414
Li 2012	Asian	PB	Other	141	124	111	168
Zhao 2013	Asian	PB	Other	342	275	401	465
Ichikawa 2015	Asian	HB	PCR-RFLP	104	24	119	52
Zhang 2015	Asian	HB	Other	207	227	183	261
Mou 2015	Asian	PB	Other	126	23	34	5
Turdikulova 2016	Asian	HB	PCR-RFLP	190	78	109	119
Qiu 2016	Asian	HB	Taqman	489	537	383	663
Sun 2016	Asian	HB	Taqman	309	332	297	405
cai 2017	Asian	PB	PCR-RFLP	225	215	173	268
Sung 2017	Asian	HB	GWAS	112	24	84	54
Yan 2019	Asian	HB	Taqman	236	269	191	337
Reza 2020	Asian	HB	PCR-RFLP	29	62	24	63
Guan 2020	HB	Asian	Other	337	615	744	1071
