# Supplementary material for: An association study on PSCA rs2294008 polymorphism and gastric cancer: A meta-analysis
Source: Front Gastroenterol (Lausanne). 2022 Oct 24;1:944525. doi: 10.3389/fgstr.2022.944525 (PMC12952324; doi:10.3389/fgstr.2022.944525)
Supplement: Supplementary file 6 [file Table_6.xlsx]

## Sheet: Sheet1
Author	Ethnicity	SOC	Genotyping	TT(case)	CC	TT（control）	CC
Lochhead 2011	Caucasian	PB	Taqman	94	85	49	49
Lochhead 2011	Caucasian	PB	Taqman	102	47	115	101
Sala 2012	Caucasian	PB	Taqman	118	93	310	491
Rizzato 2013	Caucasian	PB	Taqman	69	23	319	231
Kupcinskas 2014	Caucasian	HB	Taqman	102	33	56	64
Sun 2014	Caucasian	HB	Taqman	49	17	32	30
Garcia- Gonzalez 2015	Caucasian	HB	Taqman	147	154	130	199
Patricio 2020	Other	HB	other	35	110	67	87
Sakamoto 2008	Asian	HB	Taqman	277	133	92	122
Sakamoto{J} 2008	Asian	HB	GWAS	728	96	536	210
Wu 2009	Asian	PB	PCR-RFLP	132	759	77	506
Matsuo 2009	Asian	HB	Taqman	49	330	97	273
Ou 2010	Asian	HB	PCR-RFLP	18	85	18	132
Lu 2010	Asian	PB	PCR-RFLP	72	547	77	605
Zeng 2011	Asian	HB	PCR-RFLP	42	202	37	289
Song 2011	Asian	HB	PCR-RFLP	1049	570	468	414
Li 2012	Asian	PB	other	35	124	21	168
Zhao 2013	Asian	PB	other	100	275	85	465
Ichikawa 2015	Asian	HB	PCR-RFLP	65	24	95	52
Zhang 2015	Asian	HB	other	41	227	36	261
Mou 2015	Asian	PB	other	49	23	91	5
Qiu 2016	Asian	HB	Taqman	98	537	146	663
Turdikulova 2016	Asian	HB	PCR-RFLP	0	78	20	119
Sun 2016	Asian	HB	Taqman	61	332	72	405
cai 2017	Asian	PB	PCR-RFLP	45	215	47	268
Sung 2017	Asian	HB	GWAS	58	24	32	54
Yan 2019	Asian	HB	Taqman	44	269	64	337
Reza 2020	Asian	HB	PCR-RFLP	8	62	9	63
Guan 2020	HB	Asian	Other	30	615	149	1071
