# Supplementary material for: An association study on PSCA rs2294008 polymorphism and gastric cancer: A meta-analysis
Source: Front Gastroenterol (Lausanne). 2022 Oct 24;1:944525. doi: 10.3389/fgstr.2022.944525 (PMC12952324; doi:10.3389/fgstr.2022.944525)
Supplement: Supplementary file 7 [file Table_7.xlsx]

## Sheet: Sheet1
Author	SOC	Ethnicity	Genotyping	T	C	t	c
Lochhead 2011	PB	Caucasian	Taqman	317	299	208	208
Lochhead 2011	PB	Caucasian	Taqman	347	237	396	368
Sala 2012	PB	Caucasian	Taqman	434	384	1334	1696
Rizzato 2013	PB	Caucasian	Taqman	224	132	1145	969
Kupcinskas 2014	HB	Caucasian	Taqman	320	182	235	251
Sun 2014	HB	Caucasian	Taqman	162	98	127	123
Garcia- Gonzalez 2015	HB	Caucasian	Taqman	596	610	606	744
Patricio 2020	HB	Other	Other	232	382	382	232
Sakamoto 2008	HB	Asian	Taqman	1015	727	360	420
Sakamoto{J} 2008	HB	Asian	GWAS	2156	892	1722	1070
Wu 2009	PB	Asian	PCR-RFLP	1083	2337	566	1424
Matsuo 2009	HB	Asian	Taqman	427	989	532	884
Ou 2010	HB	Asian	PCR-RFLP	129	263	132	360
Lu 2010	PB	Asian	PCR-RFLP	548	1498	541	1597
Zeng 2011	HB	Asian	PCR-RFLP	300	620	297	801
Song 2011	HB	Asian	PCR-RFLP	3718	2760	1754	1646
Li 2012	PB	Asian	Other	211	389	153	447
Zhao 2013	PB	Asian	Other	542	892	571	1331
Ichikawa 2015	HB	Asian	PCR-RFLP	234	152	309	223
Zhang 2015	HB	Asian	Other	289	661	255	705
Mou 2015	PB	Asian	Other	224	172	216	44
Turdikulova 2016	HB	Asian	PCR-RFLP	190	346	149	347
Qiu 2016	HB	Asian	Taqman	685	1563	675	1709
Sun 2016	HB	Asian	Taqman	431	973	441	1107
cai 2017	PB	Asian	PCR-RFLP	315	655	267	709
Sung 2017	HB	Asian	GWAS	228	160	148	192
Yan 2019	HB	Asian	Taqman	324	774	319	865
Reza 2020	HB	Asian	PCR-RFLP	45	153	42	150
Guan 2020	HB	Asian	Other	397	1567	1042	2886
